# Supplementary material for: Autism risk linked to prematurity is more accentuated in girls
Source: PLoS One. 2020 Aug 27;15(8):e0236994. doi: 10.1371/journal.pone.0236994 (PMC7452728; doi:10.1371/journal.pone.0236994)
Supplement: S1 Data — (XLSX) [file pone.0236994.s001.xlsx]

## Sheet: Sheet1
num	Gender 2	Age of 1st ASD Diag_FINAL	AGE	age at last visit	week born	BW_1	twins ((Identical or not))	Twins=1	comment	ASD	CP	GDD	ADHD	MR/ID_new	IUGR/SGA	ADOS [yes/no]	birthweight (grams)	height	head circumference
1	M		14years8months	6years9months	26	26	0	0		0	0	0	0	0	0	0	825
2	M		9years0months	6years8months	29	29	0	0		0	0	0	1	0	0	0	777
3	M		4years9months	4years4months	32.1	32	2	1		0	0	1	0	0	0	0	1505
4	F		4years9months	3years9months	32.1	32	2	1		0	0	0	0	0	0	0	1740
5	M		4years9months	3years9months	32.1	32	2	1		0	0	0	0	0	0	0	2000
6	M		4years9months	4years4months	33	33	1	1		0	0	0	0	0	0	0	2086
7	M		4years11months	3years5months	31	31	1	1	identical	0	0	0	0	0	0	0	1464
8	M		4years11months	3years5months	31	31	1	1	identical	0	0	0	0	0	0	0	1520
9	M	4.35	4years11months	4years6months	36.5	37	0	0		0	0	0	0	0	1	0	1676
10	F		5years0months	3years6months	31.5	32	0	0		0	0	0	0	0	0	0	920
11	F		4years10months	3years3months	25	25	0	0		0	1	0	0	0	0	0	672
12	M		5years1months	4years6months	34.4	34	1	1	identical	0	0	0	0	0	0	0	2045		32.5
13	M		5years1months	4years6months	34.4	34	1	1	identical	0	0	0	0	0	0	0	1860		31.5
14	F		5years1months	3years7months	29	29	1	1		0	0	0	0	0	0	0	1119
15	F		5years1months	3years7months	29	29	1	1		0	0	0	0	0	0	0	1127
16	F		5years0months	3years7months	27	27	0	0		0	0	0	0	0	0	0	640
17	F		4years8months	3years0months	36.4	36	0	0		0	0	0	0	0	0	0	1948		32
18	M		4years2months	3years9months	25	25	0	0		0	0	0	0	0	0	0	874
19	M		5years6months	3years1months	33	33	0	0		0	0	0	0	0	0	0	1600		29.5
20	M		5years8months	5years0months	33.5	34	0	0		0	1	0	0	0	0	0	2030		30.5
21	M		6years0months	4years5months	31.4	31	1	1		0	0	0	0	0	1	0	706
22	F		5years8months	3years11months	34	34	0	0		0	0	0	0	0	0	0	1435
23	M		6years3months	5years10months	32	32	0	0		0	0	0	0	0	0	0	1166
24	F		6years2months	5years6months	25	25	1	1		0	0	0	2	0	0	0	620
25	M		6years3months	4years5months	34	34	0	0		0	0	1	0	0	0	0	1260
26	F		5years11months	3years3months	32	32	0	0		0	0	0	0	0	0	0	1735
27	M		5years4months	5years2months	32	32	0	0		0	0	0	0	0	0	0	1898
28	F		3years0months	3years0months	34.5	35	0	0		0	0	0	0	0	0	0	2500
29	F		5years6months	4years10months	28	28	1	1		0	0	0	0	0	0	0	1200
30	M		5years6months	5years3months	28	28	1	1		0	0	0	2	0	0	0	1100
31	M	2.33	4years4months	3years9months	36.6	37	0	0		0	0	0	0	0	1	0	1730
32	M		6years1months	5years11months	26.6	27	1	1		0	0	1	0	0	0	0	890
33	M		6years1months	5years5months	26.6	27	1	1		0	0	0	0	0	0	0	760
34	F		7years5months	3years11months	35	35	0	0		0	0	0	0	0	0	0	2500
35	M		6years5months	5years7months	25	25	0	0		0	1	1	0	0	0	0	800
36	F		7years5months	3years9months	29	29	0	0		0	0	0	0	0	0	0	1500
37	M		7years2months	6years5months	32	32	1	1		0	0	0	2	0	0	0	2040
38	M		7years5months	5years1months	30	30	1	1		0	0	0	0	0	0	0	1128
39	M		7years5months	5years1months	30	30	1	1		0	0	0	0	0	0	0	1128
40	M		7years7months	5years9months	25	25	0	0		0	1	0	0	1	1	0	680
41	F		7years8months	5years1months	27	27	0	0		0	0	0	0	0	0	0	915
42	M		7years10months	3years0months	31	31	0	0		0	1	1	0	0	0	0	1190
43	M		7years10months	5years11months	28.4	28	0	0		0	0	0	0	0	0	0	1300
44	F		7years9months	6years9months	29.1	29	0	0		0	1	0	0	0	1	0	820
45	M		7years11months	5years6months	25	25	0	0		0	0	0	0	0	0	0	880
46	M		8years1months	3years6months	33	33	1	1		0	0	0	0	0	0	0	1790		30.5
47	M		8years1months	3years7months	33	33	1	1		0	0	0	0	0	0	0	2064
48	M		8years1months	5years0months	34.5	35	0	0		0	0	0	0	0	0	0	3100
49	M		7years11months	6years1months	26	26	0	0		0	0	0	2	0	0	0	1164
50	M		8years0months	6years2months	37	37	0	0		0	0	0	0	0	1	0	1700
51	M		8years0months	5years11months	34.5	35	1	1		0	0	0	0	0	0	0	2680
52	M		8years0months	5years11months	34.5	35	1	1		0	0	0	0	0	0	0	3025
53	M		8years0months	5years0months	34	34	1	1		0	0	0	0	0	0	0	2140
54	M		8years0months	5years0months	34	34	1	1		0	0	0	0	0	0	0	1790
55	M		7years11months	4years2months	27	27	0	0		0	1	0	0	0	0	0	915
56	M		8years0months	6years4months	36	36	1	1		0	0	0	0	0	1	0	1700
57	M		8years0months	6years4months	36	36	1	1		0	0	0	0	0	0	0	1950		31.5
58	M		8years5months	6years4months	26	26	1	1		0	0	0	1	0	0	0	854
59	F		8years5months	6years4months	26	26	1	1		0	0	0	0	0	0	0	898
60	M		8years5months	6years3months	34	34	0	0		0	0	0	0	0	0	0	1430
61	F		8years6months	3years5months	31	31	1	1		0	1	1	0	1	1	0	1432
62	F		8years6months	8years1months	31	31	1	1		0	0	0	2	0	0	0	1128
63	M		8years6months	4years6months	27	27	0	0		0	1	1	0	0	0	0	500
64	M		8years10months	4years3months	35	35	0	0		0	0	0	0	0	0	0	1940
65	F		8years10months	3years7months	33	33	0	0		0	0	0	0	0	0	0	2130
66	M		8years10months	3years6months	34	34	0	0		0	0	0	0	0	0	0	1854
67	F		8years11months	6years0months	25	25	0	0		0	1	0	0	1	1	0	675
68	M		8years11months	8years10months	27	27	0	0		0	1	0	2	0	0	0	1048
69	M		10years2months	4years3months	33	33	1	1		0	1	0	0	0	0	0	1468
70	F		9years5months	6years3months	28	28	0	0		0	0	0	1	0	0	0	1275
71	F		9years9months	3years5months	28	28	0	0		0	0	0	0	0	0	0	704		23
72	M		9years8months	3years1months	32.5	33	0	0		0	0	0	0	0	0	0	1770
73	F		9years5months	5years8months	34	34	0	0		0	0	0	0	0	0	0	1820
74	F		9years5months	5years10months	31	31	1	1		0	0	0	2	0	0	0	1534
75	F		9years5months	5years8months	31	31	1	1		0	0	0	2	0	0	0	1668
76	M		9years2months	6years2months	29	29	0	0		0	1	0	2	0	0	0	1344
77	F		9years7months	7years9months	27	27	0	0		0	0	0	1	0	0	0	510
78	F		9years1months	7years8months	29	29	0	0		0	1	0	0	0	0	0	1276
79	M		10years3months	6years1months	35	35	0	0		0	0	0	0	0	0	0	1585
80	M		10years4months	4years9months	34	34	0	0		0	0	0	2	0	0	0	2700
81	F		10years2months	6years9months	34	34	0	0		0	0	0	1	0	0	0	2000
82	F		10years1months	8years4months	34.5	35	1	1		0	0	0	2	0	0	0	1665
83	M		9years11months	5years11months	31	31	0	0		0	0	0	0	0	0	0	1190
84	F		9years11months	6years10months	26.3	26	0	0		0	0	0	2	0	0	0	800
85	F		9years10months	3years11months	25	25	0	0		0	0	0	0	0	0	0	640
86	F		9years10months	4years0months	25	25	0	0		0	0	0	2	0	0	0	608
87	M		9years10months	3years6months	31	31	0	0		0	0	0	0	0	0	0	1660
88	M		10years0months	3years6months	31	31	0	0		0	0	0	0	0	0	0	865
89	M		11years0months	5years1months	31.3	31	0	0		0	0	0	0	0	0	0	2465
90	M		11years0months	6years5months	33	33	1	1		0	0	0	2	0	0	0	1500
91	M		11years0months	3years4months	25	25	0	0		0	0	0	0	0	0	0	732
92	M		11years0months	3years0months	30	30	0	0		0	0	0	0	0	0	0	1140
93	M		10years9months	7years0months	25	25	0	0		0	0	0	1	0	0	0	739
94	F		10years11months	7years6months	34	34				0	1	0	0	0	1	0
95	F		11years8months	8years0months	29	29	0	0		0	0	0	1	0	0	0	675
96	M		11years4months	5years9months	27	27	1	1		0	0	0	2	0	0	0	1300
97	F		11years4months	8years1months	27	27	0	0		0	0	0	2	0	0	0	1100
98	M		12years3months	10years2months	30	30	0	0		0	1	0	0	0	0	0	1338
99	M		12years5months	4years11months	31	31	0	0		0	0	0	0	0	0	0	1550
100	M		12years9months	6years4months	25	25	0	0		0	0	0	2	0	0	0	825
101	M		12years3months	6years10months	30	30	1	1		0	1	0	0	1	1	0	1100
102	M		12years3months	6years10months	30	30	1	1		0	1	0	0	1	1	0	928
103	M		12years10months	7years0months	32	32	1	1		0	0	0	1	1	1	0
104	M		13years7months	6years6months	32	32	0	0		0	0	0	1	0	0	0	1200
105	M		13years4months	5years9months	30	30	1	1		0	0	0	0	0	0	0	1200
106	F		13years3months	5years6months	29	29	0	0		0	0	0	0	0	0	0	835
107	M		13years6months	7years8months	27.4	27	0	0		0	0	0	0	0	0	0	817
108	M		13years9months	6years3months	31	31	1	1		0	0	0	0	0	0	0	1570
109	M		13years9months	6years11months	31	31	1	1		0	0	0	3	0	0	0	3100
110	F		14years2months	6years11months	32	32	0	0		0	0	0	0	0	0	0	1700
111	M		14years3months	13years4months	27	27	0	0		0	1	0	1	0	0	0	655
112	M		14years3months	1913years4months	27	27	1	1		0	1	0	1	0	0	0	930
113	M		14years10months	14years2months	32	32	0	0		0	1	1	2	1	1	0	1790
114	M		3years9months	3years0months	35	35	0	0		0	0	0	0	0	0	0	2550
115	M		3years10months	3years4months	34	34	0	0		0	0	0	0	0	0	0	2825
116	M		3years10months	3years5months	27	27	0	0		0	0	0	0	0	1	0	810
117	M		3years7months	3years1months	32	32	1	1		0	0	0	0	0	0	0	1490
118	F		3years7months	3years2months	32	32	1	1		0	0	0	0	0	0	0	1130
119	F		4years5months	3years1months	33	33	0	0		0	0	0	0	0	0	0	1432
120	M		4years4months	3years11months	26	26	0	0		0	0	1	0	0	0	0	1000
121	F		3years8months	3years2months	34	34	1	1		0	0	1	0	0	0	0	1800
122	M		3years8months	3years1months	34	34	1	1		0	0	1	0	0	0	0	2220
123	F		3years11months	3years5months	27	27	0	0		0	0	0	0	0	0	0	1282
124	F		4years4months	3years11months	32.4	32	1	1		0	0	1	0	0	1	0	765
125	M		4years4months	3years11months	32.4	32	1	1		0	0	0	0	0	0	0	1840
126	M	4.19	3years9months	3years1months	31	31	1	1		0	0	0	0	0	0	0	1400
127	M		4years0months	3years2months	35	35	0	0		0	0	0	0	0	0	0	2440
128	F		6years10months	3years1months	26.4	26	0	0		0	0	0	0	0	0	0	944
129	F		5years9months	5years8months	31	31	1	1		0	0	0	0	0	0	0	1648
130	M		5years9months	5years8months	31	31	1	1		0	0	0	0	0	0	0	1400		28
131	F		5years9months	4years11months	35	35	0	0		0	0	0	0	0	0	0	2730
132	M		6years7months	3years10months	36	36	0	0		0	0	0	0	0	0	0	1900
133	F		6years11months	3years4months	25	25	0	0		0	1	0	0	0	0	0	650
134	M		7years0months	3years0months	31	31	0	0		0	0	0	0	0	0	0	2360
135	F		6years9months	5years11months	31	31	1	1		0	0	0	0	0	0	0	1340
136	M		6years9months	6years2months	31	31	1	1		0	0	1	0	0	0	0	1430
137	M		6years1months	4years1months	26	26	0	0		0	1	0	0	0	0	0	886
138	M		6years5months	4years10months	25	25	1	1		0	1	1	0	0	0	0	754
139	M		6years5months	4years10months	25	25	1	1		0	1	1	0	0	0	0	766
140	F		6years5months	5years9months	30.4	30	0	0		0	0	0	0	0	0	0	1250
141	M		6years5months	5years9months	30.4	30	0	0		0	0	1	0	0	0	0	1380
142	F		5years5months	3years6months	33	33	0	0		0	0	1	0	0	0	0	1300
143	M		5years5months	4years10months	37	37	0	0		0	0	1	0	0	0	0	1865
144	F		6years6months	3years9months	33	33	1	1		0	0	1	0	0	0	0	1000
145	M		5years10months	4years10months	30	30	1	1	twin died	0	0	0	0	0	0	0	680
146	M		5years10months	3years2months	33	33	1	1		0	0	0	0	0	0	0	1535
147	F		7years1months	6years7months	35	35	0	0		0	0	0	0	0	0	0	2050
148	F		7years1months	3years2months	27	27	1	1		0	0	0	0	0	0	0	904		24.8
149	M		7years1months	3years2months	27	27	1	1		0	0	0	0	0	0	0	852		25
150	M		7years1months	5years1months	31	31	0	0		0	0	0	0	0	0	0	1200
151	F		6years4months	3years11months	33	33	0	0		0	0	0	0	0	0	0	2158
152	M		6years7months	5years3months	28	28	0	0		0	0	0	0	0	0	0	1150
153	M		7years1months	5years2months	35	35	1	1		0	0	0	0	0	0	0	2040		32.1
154	F		7years1months	5years1months	35	35	0	0		0	0	0	0	0	0	0	1700
155	F		6years8months	6years1months	36.5	37	1	1		0	0	0	0	0	0	0	1650
156	M		7years2months	5years7months	35.2	35	1	1		0	0	0	0	0	0	0	1280
157	M		7years2months	5years8months	35	35	1	1		0	0	0	0	0	0	0	2320
158	M		7years3months	6years11months	28.2	28	1	1		0	0	0	0	0	0	0	1300
159	M		7years3months	3years3months	25	25	0	0		0	0	0	0	0	0	0	960
160	M		8years3months	5years8months	37	37	0	0		0	0	0	0	0	0	0	1885
161	M		8years3months	7years1months	34	34	0	0		0	0	0	3	0	0	0	2125
162	M		8years5months	3years6months	34	34	0	0		0	0	1	0	0	0	0	2030
163	M		8years5months	6years3months	34	34	0	0		0	0	0	0	0	0	0	2200
164	M		8years8months	3years5months	35	35	1	1		0	0	0	0	0	0	0	1500
165	M		8years10months	3years9months	28.5	29	0	0		0	0	0	0	0	0	0	1050
166	F		9years0months	6years4months	28	28	0	0		0	0	1	0	0	0	0	863
167	M		9years0months	3years1months	32	32	1	1		0	0	0	0	0	0	0	1908
168	M		9years0months	3years4months	32	32	1	1		0	0	0	0	0	0	0	1879
169	F		8years9months	5years11months	31	31	1	1		0	0	0	0	0	0	0	1430
170	F		8years9months	6years6months	31	31	1	1		0	0	0	2	0	0	0	1670
171	M		8years9months	4years11months	25	25	0	0		0	0	0	0	0	0	0	817
172	M		9years1months	3years2months	29	29	1	1		0	0	0	0	0	0	0	1060
173	M		9years1months	3years2months	29	29	1	1		0	0	0	0	0	0	0	1040
174	F		9years1months	1903years3months	30	30	0	0		0	1	1	0	0	0	0	1218
175	M		9years1months	3years2months	33	33	0	0		0	0	0	0	0	1	0	1530
176	M		9years3months	7years2months	31	31	0	0		0	0	0	1	0	0	0	794
177	M		9years3months	3years5months	35	35	0	0		0	0	1	0	0	0	0	2520
178	M		9years4months	5years5months	30	30	1	1		0	0	0	2	0	0	0	662
179	F		9years4months	5years4months	30	30	1	1		0	0	0	2	0	0	0	1460
180	M		9years4months	3years4months	35	35	1	1		0	0	0	0	0	0	0	1700
181	F		9years4months	3years4months	30	30	0	0		0	0	0	0	0	0	0	1800
182	F		9years4months	3years6months	30	30	0	0		0	0	1	0	0	0	0	740
183	F		9years5months	3years5months	32	32	1	1		0	1	1	0	0	0	0	1348
184	F		9years5months	3years9months	34	34	0	0		0	0	0	0	0	0	0	2130
185	M		9years4months	5years4months	28	28	0	0		0	1	0	0	0	0	0	1250
186	F		9years2months	4years1months	33	33	0	0		0	0	0	0	0	0	0	1875
187	M		10years6months	7years4months	35	35	1	1		0	0	0	2	0	0	0	750
188	F		10years6months	5years11months	35	35	1	1		0	0	0	0	0	0	0	1750
189	M		10years6months	5years1months	28	28	0	0		0	0	0	0	0	0	0	1085
190	M		10years6months	5years5months	34	34	1	1		0	0	0	0	0	0	0	1400
191	F		10years6months	5years6months	34	34	1	1		0	0	0	1	0	0	0	2035
192	F		10years5months	5years9months	31	31	0	0		0	0	0	2	0	0	0	1155
193	F		9years11months	7years6months	28.5	29	0	0		0	1	0	2	0	0	0	1056
194	M		10years2months	3years1months	30	30	0	0		0	0	0	0	0	0	0	930
195	F		11years3months	7years8months	33	33	1	1		0	0	0	1	0	0	0	2075
196	M		10years3months	4years9months	29	29	0	0		0	1	1	0	0	0	0	1300
197	F		11years5months	5years4months	33	33	1	1		0	0	0	3	0	0	0	2100
198	F		11years5months	4years7months	33	33	1	1		0	0	0	0	0	0	0	1833
199	M		11years4months	7years4months	28	28	0	0		0	0	0	1	0	0	0	1115
200	M		10years7months	4years9months	31	31	0	0		0	0	0	2	0	0	0	700
201	M		11years4months	7years2months	32	32	0	0		0	1	0	0	0	0	0	1300
202	M		11years11months	5years11months	34	34	1	1		0	0	0	0	0	0	0	1080
203	M		12years1months	7years4months	34	34	0	0		0	0	0	2	0	0	0	2800
204	M		11years9months	4years4months	27	27	0	0		0	0	0	0	0	0	0	940
205	M		12years5months	10years4months	25	25	0	0		0	0	0	1	1	1	0	660
206	M		12years6months	6years7months	30	30	0	0		0	0	0	0	0	0	0	1260
207	M		12years10months	6years1months	26	26	2	1	only surviving	0	0	0	0	0	0	0	860
208	M		13years4months	7years9months	31	31	0	0		0	0	0	2	0	0	0	1370
209	M		11years1months	6years5months	31	31	0	0		0	0	0	2	0	0	0	1080
210	F		11years1months	4years3months	29	29	0	0		0	0	0	0	0	0	0	1169
211	F		14years9months	9years0months	28	28	0	0		0	1	0	3	1	1	0	780
212	M	7	8years8months	8years2months	24	24	0	0		0	1	0	2	1	1	1	713
213	M		3years5months	3years0months	36	36	0	0		0	0	0	0	0	0	0	1840
214	F		3years5months	3years1months	36	36	0	0		1	1	1	0	0	0	0	2240
215	M	4.81	12years6months	12years0months	35	35	1	1		1	0	0	3	0	0	1	1775
216	M	5.5	12years7months	5years6months	34	34	1	1		1	0	0	0	1	1	0	2200
217	M		12years0months	7years6months	31	31	0	0		1	0	0	1	0	0	0	1600
218	F	5.06	11years1months	6years7months	25	25	1	1	(twin died at 5 days old	1	0	0	2	0	0	0	910
219	F	2.68	8years7months	3years8months	26.3	26	0	0		1	0	0	0	0	0	0	1100
220	M	8.51	10years8months	8years7months	29	29	0	0		1	1	0	1	0	0	1	895
221	M		9years10months	9years3months	35	35	0	0		1	1	0	0	0	0	0	3550
222	F	2.38	8years10months	8years6months	34	34	0	0		1	0	0	0	0	0	0	2007
223	M		8years4months	3years6months	25	25	1	1		1	0	1	0	0	0	0	958
224	M	2.7	8years3months	7years1months	34	34	1	1		1	0	1	0	0	0	0	2125
225	M	4.63	7years7months	6years1months	31.6	32	1	1		1	1	0	0	0	0	0	1650
226	M	1.66	7years3months	6years6months	35.6	36	0	0		1	0	1	0	0	0	1	3100
227	M	2.97	7years3months	6years11months	28.2	28	1	1		1	0	0	3	0	0	0	1100
228	M	1.08	6years4months	3years9months	28	28	0	0		1	0	0	0	0	0	0	850
229	M	2.78	7years0months	6years1months	34	34	0	0		1	0	1	0	1	1	1	1700
230	M	2.63	4years4months	2years7months	32	32	1	1		1	0	1	0	0	0	0	1370
231	M	3.5	13years0months	6years5months	29	29	1	1		1	0	0	0	0	0	0	940
232	M	2	12years10months	7years8months	25	25	0	0		1	1	0	0	0	0	0	600
233	M		12years4months	7years3months	26	26	0	0		1	0	0	1	0	0	0	504
234	M	4.42	12years4months	6years8months	35.2	35	0	0		1	0	0	0	0	0	0	1883
235	M	6.97	10years1months	7years0months	33	33	1	1		1	0	0	0	0	0	0	2200
236	M	4.92	10years1months	6years11months	33	33	1	1		1	0	0	0	0	0	0	2000
237	F	3.2	11years1months	5years0months	27	27	1	1		1	0	0	0	0	0	0	680
238	F	4	11years1months	4years7months	27	27	1	1		1	0	1	0	0	0	0	845
239	F	3.25	10years1months	6years5months	25.4	25	0	0		1	1	0	2	0	0	0	935
240	M	4	9years7months	9years1months	32	32	0	0		1	0	0	0	0	0	0	1586
241	F	5.49	8years11months	7years1months	24.6	25	0	0		1	0	0	1	0	0	0	368
242	M	2	5years6months	4years10months	37	37	0	0		1	0	1	0	0	0	0	1880
243	F	3.55	6years0months	5years7months	26	26	0	0		1	0	0	0	1	1	1	580
244	F	1.86	6years0months	5years3months	30	30	0	0		1	0	1	0	0	0	0	1520
245	M	1.3	5years11months	4years11months	33	33	1	1		1	0	0	0	0	0	1	2200
246	M	1.92	5years11months	4years5months	33	33	1	1		1	0	0	2	0	0	1	1444
247	M	2.54	5years1months	2years7months	31.6	32	1	1		1	0	0	0	0	0	0	1213
248	M	1.18	5years1months	3years10months	31	31	1	1		1	0	0	0	0	0	0	1850
249	F	1.18	5years1months	3years10months	31	31	1	1		1	0	0	0	0	0	0	1450
250	M	1.51	5years0months	4years6months	34	34	1	1		1	0	1	0	0	0	0	1742
251	F	8.4	8years7months	8years7months	25	25	0	0		1	0	0	0	0	0	1	730
252	M	3.71	4years3months	3years8months	32	32	0	0		1	0	0	0	0	0	0	1800
253	F	3.32	4years4months	3years7months	29	29	0	0		1	0	1	0	0	0	1	620
254	F	3.1	3years9months	3years1months	25	25	0	0		1	0	1	0	0	0	1	542
255	F	2.3	3years0months	2years3months	28	28	0	0		1	0	1	0	0	0	1	854
256	F		7years7months	2years2months	27	27	0	0		1	0	0	0	0	0	0	773
257	M		2years6months	2years3months	33	33	1	1		0	0	0	0	0	0	0	1990
258	F		2years6months	2years3months	33	33	1	1		0	0	0	0	0	0	0	1842
259	F		2years9months	2years2months	28.2	28	0	0		0	0	0	0	0	1	0	628
260	F		2years5months	2years1months	36	36	0	0		0	0	0	0	0	0	0	1742
261	F		3years0months	2years0months	36	36	0	0		0	0	0	0	0	0	0	2100	44
262	M		2years6months	2years0months	36	36	0	0		0	0	0	0	0	0	0	1448
263	F		2years4months	2years0months	34.5	35	1	1		0	0	0	0	0	0	0	1630
264	F		2years4months	2years0months	34.5	35	1	1		0	0	0	0	0	0	0	1335
265	M		3years5months	2years9months	28	28	0	0		0	0	0	0	0	0	0	1332
266	M		4years8months	2years8months	28	28	1	1		0	0	0	0	0	0	0	1895
267	F		8years0months	2years1months	34.3	34	1	1		0	0	0	0	0	0	0	1420
268	M		9years6months	2years10months	28	28	1	1		0	0	0	0	0	0	0	1189
269	M		9years6months	2years10months	28	28	1	1		0	0	0	0	0	0	0	1385
270	M		4years1months	2years1months	35	35	0	0		0	0	0	0	0	0	0	2400
271	M		4years3months	2years7months	27.3	27	0	0		0	0	0	0	0	0	0	838
272	F		6years2months	2years3months	30.3	30	0	0		0	0	0	0	0	0	0	1445
273	F		5years6months	2years7months	35	35	1	1		0	0	0	0	0	0	0	1140
274	F		5years6months	2years7months	35	35	1	1		0	0	0	0	0	0	0	2475
275	M		8years8months	2years10months	31.3	31	1	1		0	0	0	0	0	0	0	1332
276	M		3years5months	2years9months	28	28	0	0		0	0	0	0	0	0	0	1332
277	M		3years8months	3years6months	32.2	32	0	0		0	0	0	0	0	0	0	1958
278	M		3years7months	2years3months	27.6	28	1	1		0	0	0	0	0	0	0	686
279	M		3years10months	2years7months	31	31	0	0		0	0	0	0	0	0	0	1024
280	F		3years9months	2years2months	33.6	34	0	0		0	0	0	0	0	1	0	1130
281	M		9years11months	2years1months	32	32	0	0		0	0	0	0	0	0	0	1640
282	F		8years11months	2years3months	33.5	34	1	1		0	0	0	0	0	0	0	1344
283	M		8years11months	2years3months	33.5	34	1	1		0	0	0	0	0	0	0	1630
284	F		6years2months	2years0months	28	28	0	0		0	0	0	0	0	0	0	1020	35	26.5
285	F		3years4months	3years1months	34.2	34	1	1		0	0	0	0	0	0	0	2060
286	F		3years4months	2years10months	34.2	34	1	1		0	0	0	0	0	0	0	1950
287	M		2years8months	2years0months	35	35	0	0		0	0	0	0	0	0	0	2875
288	F		3years6months	2years0months	32	32	1	1		0	0	0	0	0	0	0	1860
289	M	2.8	3years3months	2years9months	34	34	0	0		0	0	0	0	0	0	1	2125
290	F		3years8months	2years0months	31	31	0	0		0	0	0	0	0	0	0	1715
291	M		4years8months	2years0months	33	33	0	0		0	0	0	0	0	0	0	1475
292	F		6years8months	2years2months	28.5	29	0	0		0	0	0	0	0	0	0	947
293	F		9years4months	2years4months	32	32	1	1		0	0	0	0	0	0	0	1276
294	M		4years0months	2years6months	34	34	1	1		0	0	0	0	0	0	0	1830
295	F		7years11months	2years5months	30.4	30	2	1		0	0	0	0	0	0	0	1530
296	F		7years11months	2years5months	30.4	30	2	1		0	0	0	0	0	0	0	1369
297	M		7years11months	2years5months	30.4	30	2	1		0	0	0	0	0	0	0	1260
298	F		5years7months	2years6months	32	32	1	1		0	0	0	0	0	0	0	1300
299	M		4years10months	2years3months	32	32	1	1		0	0	0	0	0	0	0	1750
300	M		4years11months	2years3months	32.6	33	1	1		0	0	0	0	0	0	0	1139
301	M		4years10months	2years8months	32	32	1	1		0	0	0	0	0	0	0	1200
302	M		6years0months	2years3months	31.4	31	1	1		0	0	0	0	0	0	0	840
303	F		5years3months	2years2months	33.5	34	0	0		0	0	0	0	0	0	0	1868
304	M		5years7months	2years6months	32	32	1	1		0	0	0	0	0	0	0	1710
305	F		2years9months	2years2months	27	27	1	1		0	0	0	0	0	0	0	732
306	F		2years9months	2years2months	27	27	1	1		0	0	0	0	0	0	0	847
307	M		2years9months	2years4months	33.5	34	1	1		0	0	0	0	0	0	0	1363
308	M		2years8months	2years2months	34	34	0	0		0	0	0	0	0	0	0	2256
309	F		2years8months	2years4months	26	26	0	0		0	0	0	0	0	0	0	777
310	F		9years0months	2years2months	31.3	31	0	0		0	0	0	0	0	0	0	1458
311	M		8years11months	2years4months	30.4	30	0	0		0	0	0	0	0	0	0	1688
312	M		8years3months	2years1months	34.2	34	1	1		0	0	0	0	0	0	0	2100
313	M		8years3months	2years1months	34.2	34	1	1		0	0	0	0	0	0	0	2140
314	F		10years2months	2years3months	26	26	0	0		0	0	0	0	0	0	0	2400
315	M		4years11months	2years3months	32.6	33	1	1		0	0	0	0	0	0	0	1684
316	M		4years11months	2years1months	28	28	0	0		0	0	0	0	0	0	0	1123
317	F		10years0months	2years3months	36	36	0	0		0	1	0	0	0	0	0	1435
318	M		10years0months	2years11months	31	31	0	0		0	0	0	0	0	0	0	940
319	M		3years6months	2years0months	32	32	1	1		0	0	0	0	0	0	0	1700
320	M		6years0months	2years3months	31.4	31	1	1		0	0	0	0	0	0	0	1570
321	M		6years8months	2years1months	27	27	0	0		0	1	0	0	0	0	0	1000
322	F		5years6months	2years1months	26	26	0	0		0	1	1	0	0	0	0	783
323	F		4years8months	2years8months	24	24	0	0		0	1	1	0	1	1	0	698
324	M		4years3months	2years6months	30.5	31	0	0		0	0	0	0	0	0	0	1895
325	F		3years9months	2years11months	31.5	32	1	1		0	0	0	0	0	1	0	1030
326	M		4years6months	2years8months	28	28	0	0		0	1	0	0	0	0	0	1460
327	M		4years6months	2years8months	34.1	34	1	1		0	1	1	0	0	0	0	1445
328	F		4years6months	2years8months	34.1	34	1	1		0	0	0	0	0	0	0	1175
329	M		4years10months	2years10months	32	32	1	1		0	1	0	0	0	0	0	1000
330	M		5years7months	2years7months	29.6	30	0	0		0	1	0	0	0	0	0	1720
331	F		5years2months	2years5months	31	31	0	0		0	0	1	0	0	0	0	684
332	F		5years2months	2years5months	31	31	1	1		0	0	1	0	0	0	0	995
333	M		6years1months	2years5months	29	29	0	0		0	0	1	0	0	0	0	1700		28
334	M		7years6months	2years7months	28	28	0	0		0	0	0	0	0	0	0	2475
335	F		7years5months	2years10months	25	25	0	0		0	1	1	0	0	0	0	1544
336	F		8years1months	2years5months	32	32	0	0		0	0	0	0	0	0	0	1620
337	M		8years7months	2years8months	28	28	0	0		0	1	0	0	1	1	0	1140
338	M		8years6months	2years9months	27	27	0	0		0	0	0	0	0	0	0	1660
339	F		8years5months	2years8months	33	33	0	0		0	0	0	0	0	0	0	1600
340	F		9years5months	2years9months	36	36	0	0		0	0	0	0	0	0	0	696
341	F		10years3months	2years8months	28	28	0	0		0	1	1	0	0	0	0	1095
342	M		4years1months	2years3months	36	36	0	0		0	0	0	0	0	0	0	1720
343	F		4years2months	2years3months	32	32	1	1		0	0	0	0	0	0	0	1030
344	F		4years4months	2years10months	32	32	1	1		0	0	0	0	0	0	0	1895
345	M		4years4months	2years9months	32	32	1	1		0	1	1	0	0	0	0	698
346	F		4years4months	2years10months	32	32	1	1		0	0	0	0	0	0	0	2080
347	M		4years10months	2years11months	34	34	0	0		0	0	0	0	0	0	0	1600
348	F		6years4months	2years9months	34	34	0	0		0	0	0	3	0	1	0	1580
349	F		8years3months	2years4months	34	34	0	0		0	0	0	0	0	1	0	696
350	F		8years8months	2years10months	31.3	31	1	1		0	0	0	0	0	0	0	1980
351	F		8years9months	2years11months	31	31	1	1		0	0	0	0	0	0	0	1189
352	M		9years4months	2years4months	32	32	1	1		0	0	0	0	0	0	0	1544
353	F		9years5months	2years11months	25	25	0	0		0	0	0	0	0	0	0	653
354	F		10years2months	2years7months	28	28	0	0		0	0	1	0	0	0	0	730
355	M		10years1months	2years8months	34	34	0	0		0	0	0	0	0	0	0	1600
356	F		4years8months	2years8months	24	24	0	0		0	1	1	0	1	1	0	698
357	M		4years3months	2years6months	30.5	31	0	0		0	0	1	0	0	0	0	1895
358	F		3years9months	2years11months	31.5	32	1	1		0	0	0	0	0	1	0	1030
359	M		4years6months	2years8months	28	28	0	0		0	1	0	0	0	0	0	1460
360	M		4years6months	2years8months	34.1	34	1	1		0	1	1	0	0	0	0	1445
361	F		4years6months	2years8months	34.1	34	1	1		0	0	0	0	0	0	0	1175
362	M		4years10months	2years10months	32	32	1	1		0	0	1	0	0	0	0	1000
363	M		5years7months	2years7months	29.6	30	0	0		0	1	0	0	0	0	0	1720
364	F		5years2months	2years5months	31	31	0	0		0	0	1	0	0	0	0	684
365	F		5years2months	2years5months	31	31	1	1		0	0	1	0	0	0	0	995
366	M		6years1months	2years5months	29	29	0	0		0	0	1	0	0	0	0	1700		28
367	M		7years6months	2years7months	28	28	0	0		0	0	0	0	0	0	0	2475
368	F		7years5months	2years10months	25	25	0	0		0	1	1	0	0	0	0	1544
369	F		8years1months	2years5months	32	32	0	0		0	0	0	0	0	0	0	1620
370	M		8years7months	2years8months	28	28	0	0		0	1	0	0	1	1	0	1140
371	M		8years6months	2years9months	27	27	0	0		0	0	0	0	0	0	0	1660
372	F		8years5months	2years8months	33	33	0	0		0	0	0	0	0	0	0	1600
373	F		9years5months	2years9months	36	36	0	0		0	0	0	0	0	0	0	696
374	F		10years3months	2years8months	28	28	0	0		0	1	1	0	0	0	0	1095
375	M		4years1months	2years3months	36	36	0	0		0	0	0	0	0	0	0	1720
376	F		4years2months	2years3months	32	32	1	1		0	1	0	0	0	0	0	1030
377	F		4years4months	2years10months	32	32	1	1		0	0	0	0	0	0	0	1895
378	M		4years4months	2years9months	32	32	1	1		0	1	1	0	0	0	0	698
379	F		4years4months	2years10months	32	32	1	1		0	0	0	0	0	0	0	2080
380	M		4years10months	2years11months	34	34	0	0		0	0	0	0	0	0	0	1600
381	F		6years4months	2years9months	34	34	0	0		0	0	0	3	0	1	0	1580
382	F		8years3months	2years4months	34	34	0	0		0	0	0	0	0	1	0	696
383	F		8years8months	2years10months	31.3	31	1	1		0	0	0	0	0	0	0	1980
384	F		8years9months	2years11months	31	31	1	1		0	0	0	0	0	0	0	1189
385	M		9years4months	2years4months	32	32	1	1		0	0	0	0	0	0	0	1544
386	F		9years5months	2years11months	25	25	0	0		0	0	0	0	0	0	0	653
387	F		10years2months	2years7months	28	28	0	0		0	0	1	0	0	0	0	730
388	M		10years1months	2years8months	34	34	0	0		0	0	0	0	0	0	0	1600
389	M		3years6months	2years10months	35	35	1	1		0	0	1	0	0	0	0	2450
390	M		4years5months	2years0months	36	36	0	0		0	0	0	0	0	0	0	2400
391	M		8years10months	2years0months	32	32	0	0		0	0	0	0	0	0	0	1530
392	M		4years0months	2years6months	37	37	1	1		0	0	0	0	0	0	0	2260
393	F		4years0months	2years6months	37	37	1	1		0	0	0	0	0	0	0	1900
394	M		9years10months	2years7months	31	31	0	0		0	0	0	0	0	0	0	1500
395	M		5years0months	2years5months	31.6	32	1	1	fraternal	0	0	0	0	0	0	0	1300
396	M		9years4months	2years2months	24	24	0	0		0	0	0	0	0	0	0	800
397	F		9years7months	2years4months	29	29	0	0		0	0	0	0	0	0	0	1360
398	M		9years6months	2years1months	35	35	0	0		0	0	0	0	0	0	0	1400
399	M		8years6months	2years0months	34	34	0	0		0	0	0	0	0	0	0	2224
400	F		6years3months	2years2months	32.6	33	1	1		0	0	0	0	0	0	0	1537
401	F		3years11months	2years4months	32.6	33	1	1		0	0	0	0	0	0	0	1490
402	F		3years11months	2years4months	32.6	33	1	1		0	0	0	0	0	0	0	940
403	M		3years7months	2years3months	27.6	28	1	1		0	0	0	0	0	0	0	694
404	M		8years4months	2years2months	32	32	1	1		0	0	0	0	0	0	0	1876
405	M		8years8months	2years4months	35	35	0	0		0	0	0	0	0	0	0	2260
406	M		5years0months	2years5months	31.6	32	1	1	fraternal	0	0	1	0	0	0	0	840
407	F		3years8months	2years9months	29	29	0	0		0	1	1	0	0	0	0	1230
408	M		3years6months	2years9months	35	35	1	1		0	0	1	0	0	1	0	1400
409	F		3years4months	2years5months	35	35	1	1		0	0	1	0	0	0	0	2000
410	F		3years2months	2years5months	29.6	30	1	1		0	0	1	0	0	0	0	1551
411	F		3years4months	2years10months	35	35	1	1		0	0	0	0	0	0	0	2070
412	M		3years6months	2years1months	25	25	0	0		0	0	0	0	0	0	0	500
413	M		3years6months	2years10months	35	35	1	1		0	0	1	0	0	1	0	1428
414	M		2years7months	2years6months	27.5	28	1	1		0	1	1	0	0	0	0	1418
415	F		2years2months	2years1months	36	36	1	1		0	0	0	0	0	0	0	1686
416	F		2years11months	2years0months	25	25	1	1		0	0	0	0	0	0	0	684
